# Supplementary material for: Social Exclusion Modifies Climate and Deforestation Impacts on a Vector-Borne Disease
Source: PLOS journal article supplement (doi:10.1371/journal.pntd.0000176), 2008-02-05
Supplement: S6 (10.1371/journal.pntd.0000176.s006) [file journal.pntd.0000176.s006]

**Table S6**. Parameters for the model presented in Figure 2

| Parameter | Estimate | S. E. | *T* | P |
| --- | --- | --- | --- | --- |
| μ0 | -7.61828 | 0.471846 | -16.146 | < 2e-16* |
| β1 (ME) | -0.00157 | 0.000386 | -4.083 | 0.000112* |
| β2 (BR(MI)) | 0.375278 | 0.098044 | 3.828 | 0.000271* |
| β3 (BR(% Close)) | -3.93909 | 1.42758 | -2.759 | 0.007318* |
| β4 (BL(% Close)) | 0.019768 | 0.009035 | 2.188 | 0.031871* |
| β5 (BL(ln(MinRainfall))) | 2.434161 | 1.26397 | 1.926 | 0.058023 |
| β6 (BL(ln(MinRainfall))2) | -5.80016 | 1.202431 | -4.824 | 7.50E-06* |
| β7 (BR(ln(MinRainfall))) | 5.512966 | 1.726986 | 3.192 | 0.002083* |

*Statistically significant (P<0.05)
